# Supplementary material for: The mineral manaksite, KNaMnSi4O10, as a supercapattery-type electrochemical energy storage material
Source: Royal Society of Chemistry journal article supplement (doi:10.1039/d3ra03629d), 2023-01-01
Supplement: d3ra03629d1.pdf [file d3ra03629d1.pdf]

## ELECTRONIC SUPPLEMENTARY INFORMATION

### The mineral manaksite, $\text{KNaMnSi}_4\text{O}_{10}$ , as a supercapattery-type electrochemical energy storage material

Gregarious Muungani, Michael N. Pillay, Werner E. van Zyl\*

*School of Chemistry and Physics, University of KwaZulu-Natal, Westville Campus, Durban, 4000, South Africa*

Email: [vanzylw@ukzn.ac.za](mailto:vanzylw@ukzn.ac.za)

#### PXRD analysis of $\text{RuO}_2$

The PXRD diffractogram is shown and the (h,k,l) indices of respective peaks are indicated.

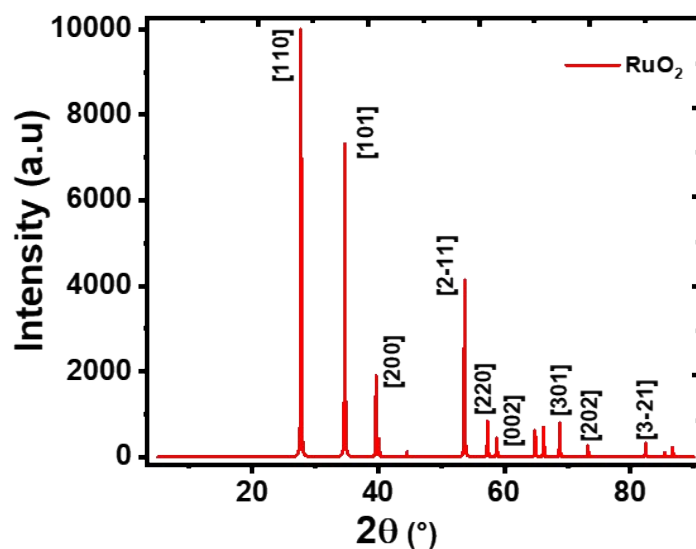

**Fig. S1.** Powder X-ray diffractogram (PXRD) of  $\text{RuO}_2$  sample.

## SEM and TEM analysis

SEM and TEM analysis of RuO<sub>2</sub> were performed and the images are shown in Fig. S2 and Fig. S3.

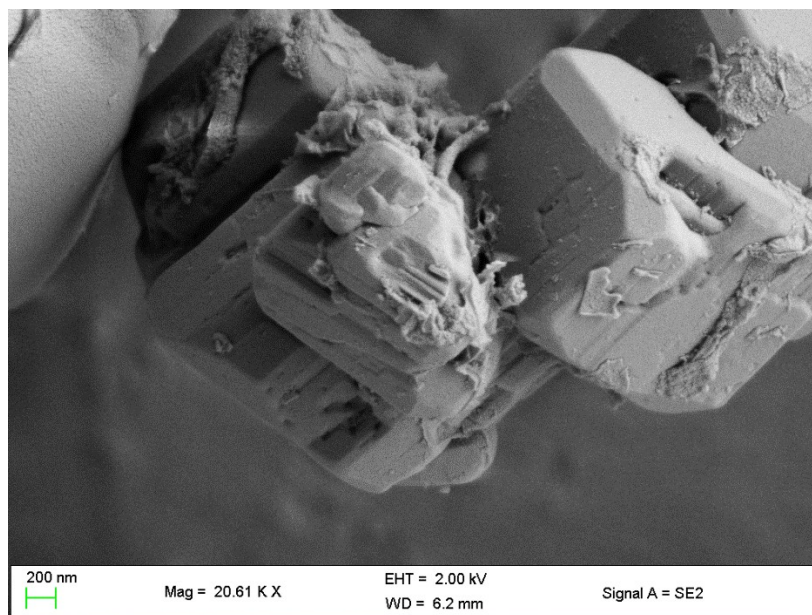

**Fig. S2.** (a) TEM micrograph, (b) SEM and (c) SEM-EDX spectrum of RuO<sub>2</sub>.

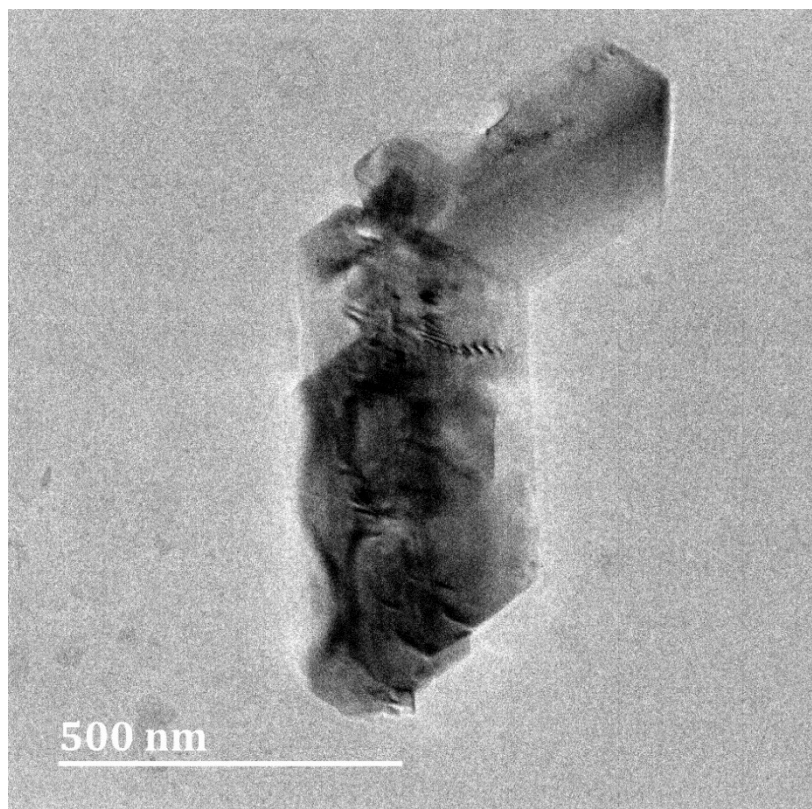

**Fig. S3.** (a) TEM micrograph of RuO<sub>2</sub>.
